# Supplementary material
Source: Springer Nature journal article supplement (https://www.springermedizin.de/resource/supplementary/12888_2012_1463_MOESM1_ESM.pdf/9480420)

# Symptom Ratings

Predictors

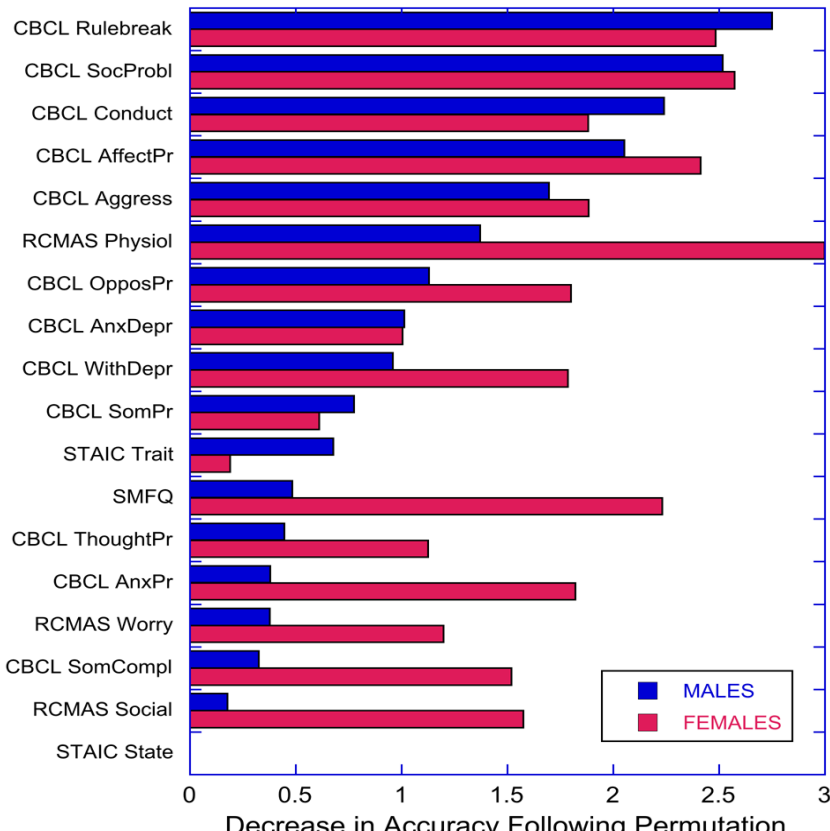

Supplement: MOESM1 [file 9480420]
